# Supplementary material
Source: Springer Nature journal article supplement (https://www.springermedizin.de/resource/supplementary/12883_2006_27_MOESM9_ESM.pdf/9456952)

PD versus APS  
Doctors prediction  
(n= PD, n= APS)

Odds ratio  
(95% CI)

sensitivity

**specificity**

Vlaar (n= 115, 32) \*

3

76%

**47%**

Lokkegaard (n= 45, 15) \*

18

87%

**73%**

Stoffers (n= 62, 8) \*

20

100%

**0%**

Schwarz '98 (n= 58, 7) \*

27

100%

**0%**

Overall (95%CI)

9 (2 , 34) #

.001

1

700

Odds ratio

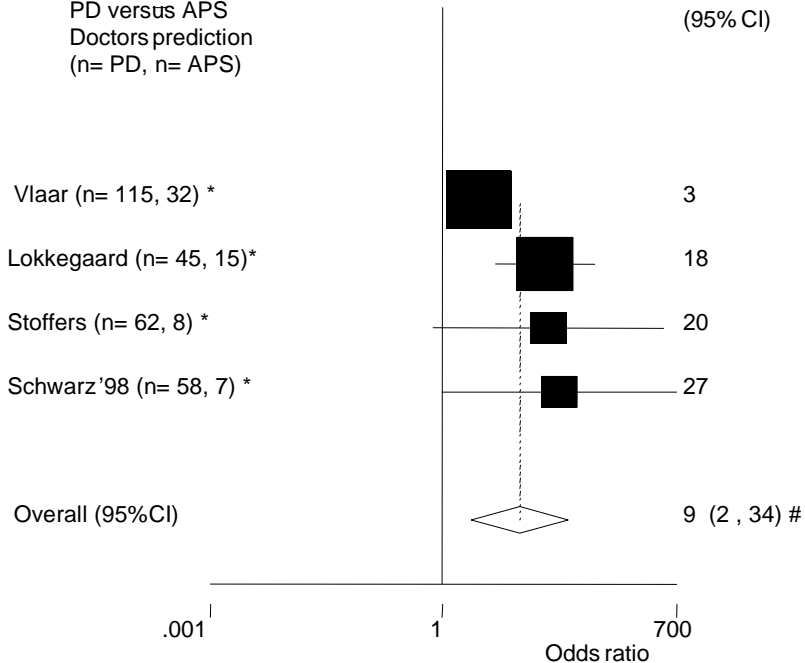

Supplement: MOESM9 [file 9456952]
